# Supplementary material for: Heterogeneous UV disinfection aided by ZnO/Al2O3 composites for inhibiting antibiotic resistant bacteria photoreactivation and gene recovery
Source: Royal Society of Chemistry journal article supplement (doi:10.1039/d1en00941a), 2022-01-01
Supplement: d1en00941a1.pdf [file d1en00941a1.pdf]

## Supplemental materials

# Heterogeneous UV Disinfection Aided by ZnO/Al<sub>2</sub>O<sub>3</sub> Composites for Inhibiting Antibiotic Resistant Bacteria Photoreactivation and Gene Recovery

Xu Wang <sup>a, b</sup>, Baiyu Zhang <sup>d</sup>, Hua Ren <sup>e</sup>, Yibin Jia <sup>a, b</sup>, Honghuan Xia <sup>a, b</sup>,  
Ping Guo <sup>a, b, c\*</sup>

<sup>a</sup> Key Lab of Groundwater Resources and Environment, Ministry of Education, Jilin University, Changchun 130021, People's Republic of China

<sup>b</sup> College of New Energy and Environment, Jilin University, Changchun 130021, People's Republic of China

<sup>c</sup> State Key Laboratory of Superhard Materials, Jilin University, Changchun 130021, People's Republic of China

<sup>d</sup> Department of Civil Engineering, Faculty of Engineering and Applied Science, Memorial University, St. John's, NL, Canada A1B 3X5

<sup>e</sup> Department of Ophthalmology, The First Hospital of Jilin University, Changchun, China

\*E-mail: guoping@jlu.edu.cn

---

## **Text S1 Preparation and characterization of synthesized ZnO@Al<sub>2</sub>O<sub>3</sub> particles**

### **1. Preparation processes**

Two steps for synthesizing ZnO@Al<sub>2</sub>O<sub>3</sub> were required in this paper, i.e. preparation of Al<sub>2</sub>O<sub>3</sub> particles by template method then loading ZnO on Al<sub>2</sub>O<sub>3</sub> via solvothermal method. Firstly, 16 g epoxy resin, 18 g polyethylene glycol 1000 and 14 g polyethylene glycol 2000 were melt down and stirred, then immediately added 4 g diethylenetriamine. Before the mixed solution began to solidify, poured the mixture into a polytetrafluoroethylene container to age under 70 °C. After 3 h aging, the white organic template was dried under 25 °C for one day. 100 mL 56.25 g/L Al(NO<sub>3</sub>)<sub>3</sub> solution was slowly dropped into 100 mL 0.5% chitosan/acetic acid, and 5 g template pieces (1 cm × 1 cm × 1 cm) were mixed together. Ammonia was dropped into the mixtures after 1 h stirring until emulsible colloidal substances occurred and pH reached around 8.5. The colloidal substances were collected through 0.45 μm filter after aging 1 h under 70 °C, then cleaned the collection with distilled water three times and dried it under 80 °C for one day. The air-dried substances were calcinated under 500 °C for 6 h. After thoroughly pulverization, the Al<sub>2</sub>O<sub>3</sub> particles were gained.

The mixtures of 3.655 g Zn(NO<sub>3</sub>)<sub>2</sub> · 6H<sub>2</sub>O and 1.646 g Na<sub>2</sub>C<sub>2</sub>O<sub>4</sub> were grinded for 10 min then were washed out with distilled water at 5000 rpm centrifugation until the conductivity of supernatant below 20 μS/cm. 0.116g dried precipitation, 0.5 g Al<sub>2</sub>O<sub>3</sub> particle and 30 mL distilled water in polytetrafluoroethylene hydrothermal reactor were reacted under 200 °C for 6 h. ZnO@Al<sub>2</sub>O<sub>3</sub> particle was gained after cleaning, drying and grinding.

### **2. Characterizations**

Pure Al<sub>2</sub>O<sub>3</sub> and ZnO particles have been already characterized in previous researches (Le et al., 2020; Lei et al., 2013; Martin et al., 1995; Yao et al., 2013), and we did not repeat these actions in our study.

Band gap energy could be gained by Eq. S1:

---

$$E_g = \frac{hc}{\lambda} \quad \text{Eq. S1}$$

where  $E_g$  was band gap energy;  $h$  was the Planck's constant ( $h=4.135667 \times 10^{-15} \text{ eV}\cdot\text{s}$ );  $c$  was the light speed ( $c=3 \times 10^8 \text{ m/s}$ ) and  $\lambda$  was the absorption wavelength of absorption edge.

## References

- Le, A. T., Ahmadipour, M., Pung, S. Y., 2020. A review on ZnO-based piezoelectric nanogenerators: Synthesis, characterization techniques, performance enhancement and applications. *J. Alloy. Compd.*, 844, 156172.
- Lei, Z., Wu, L., Gao, L., Liu, M., Shui, H., Wang, Z., Ren, S., 2013. Synthesis, characterization and evaluation of Ni–Mo/Zr–Al<sub>2</sub>O<sub>3</sub> catalyst for hydro-conversion of lignite-based heavy carbon resources. *J. Ind. Eng. Chem.*, 19(5), 1421-1425.
- Martin, C., Martin, I., Rives, V., Damyanova, S., Spojakina, A., 1995. Characterization and Fourier transform infrared spectroscopic study of surface acidity in NiMo/TiO<sub>2</sub>-Al<sub>2</sub>O<sub>3</sub> catalysts. *Spectrochim. Acta A*, 51(11), 1837-1845.
- Yao, X., Gao, F., Dong, L., 2013. The application of incorporation model in  $\gamma$ -Al<sub>2</sub>O<sub>3</sub> supported single and dual metal oxide catalysts: A review. *Chinese J. Catal.*, 34(11), 1975-1985.

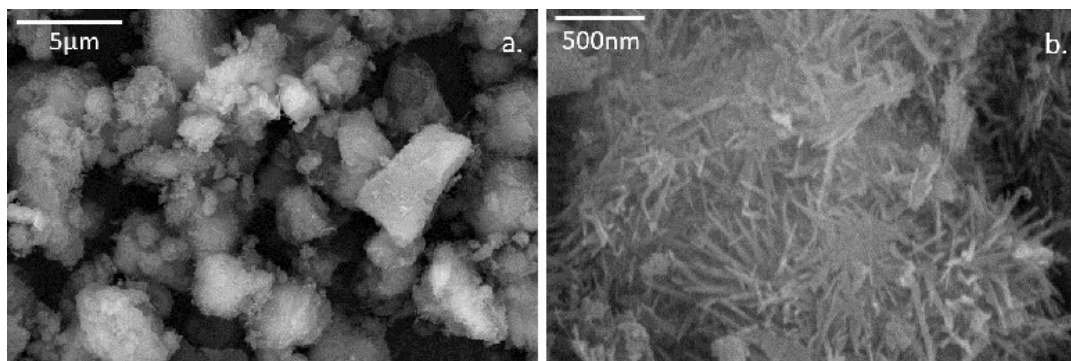

Figure S1 SEM images of ZnO@Al<sub>2</sub>O<sub>3</sub> at scales of (a.) 5 μm and (b.) 500 nm

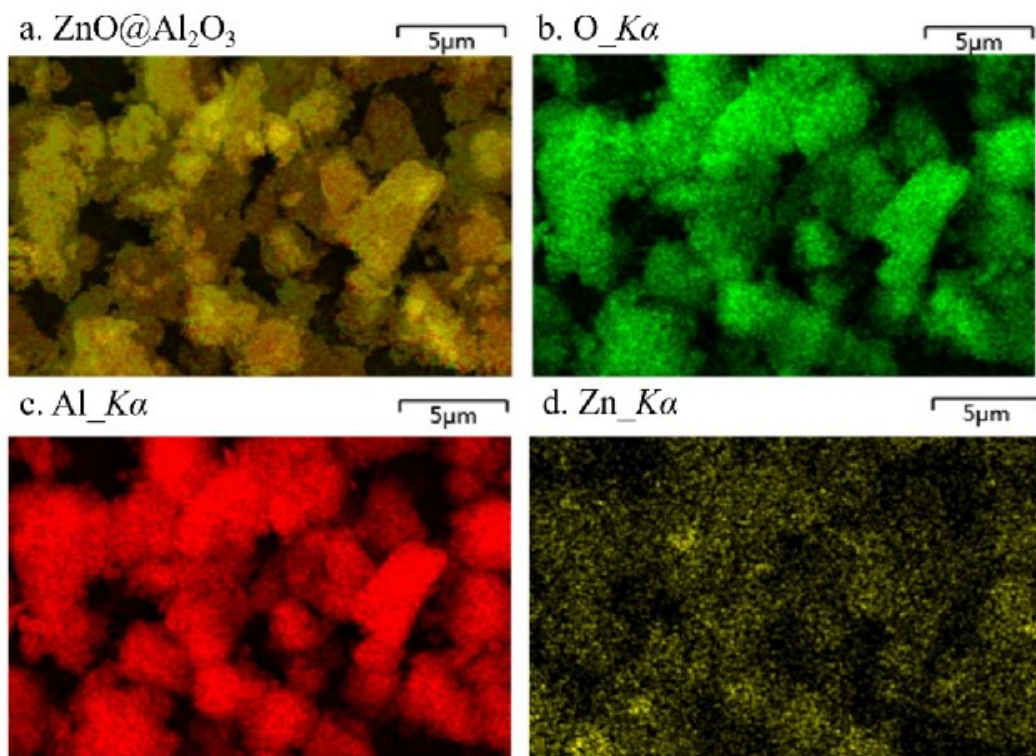

Figure S2 (a.) EDS X-ray mappings of ZnO@Al<sub>2</sub>O<sub>3</sub> particles: (b.) O; (c.) Al and (d.) Zn maps, where the K $\alpha$  peak of the elements was used for the mapping.

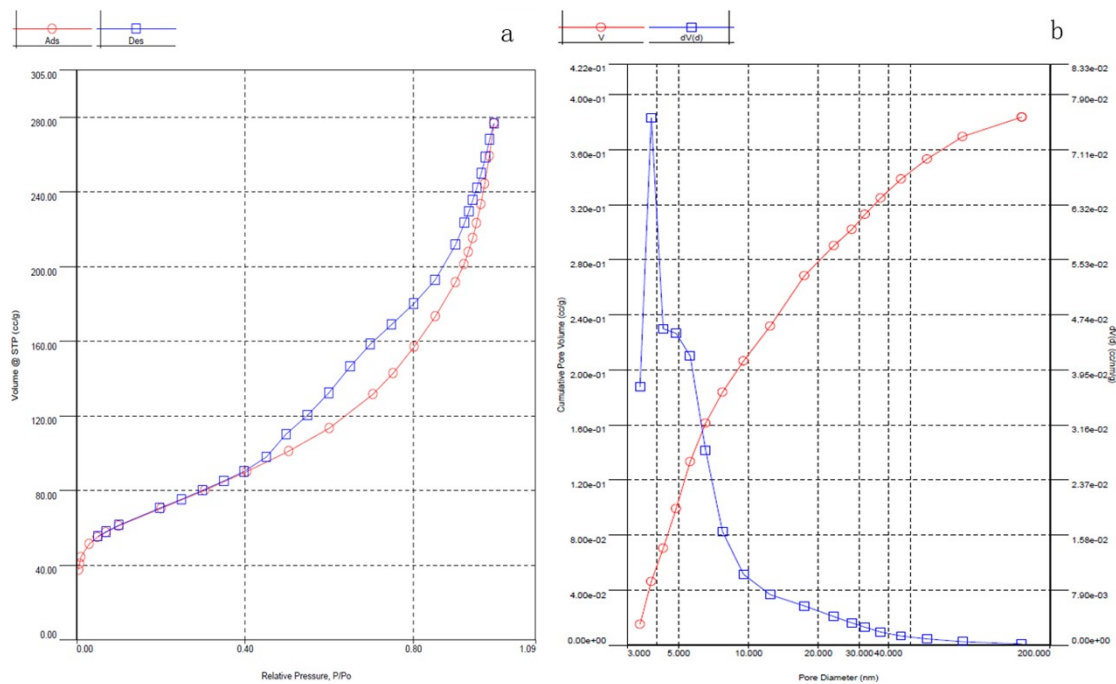

Figure S3 N<sub>2</sub> isotherm adsorption desorption curves of ZnO@Al<sub>2</sub>O<sub>3</sub>

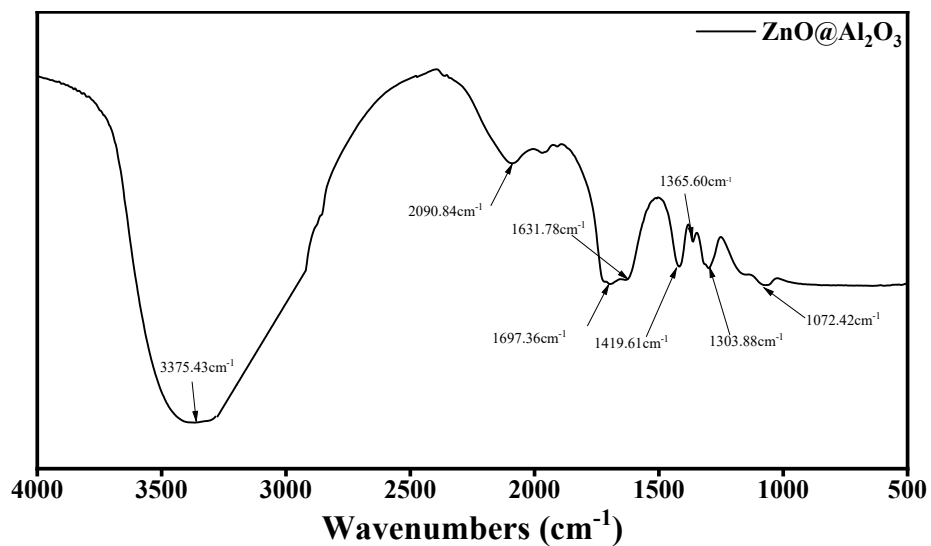

Figure S4 FTIR spectra of ZnO@Al<sub>2</sub>O<sub>3</sub> particles

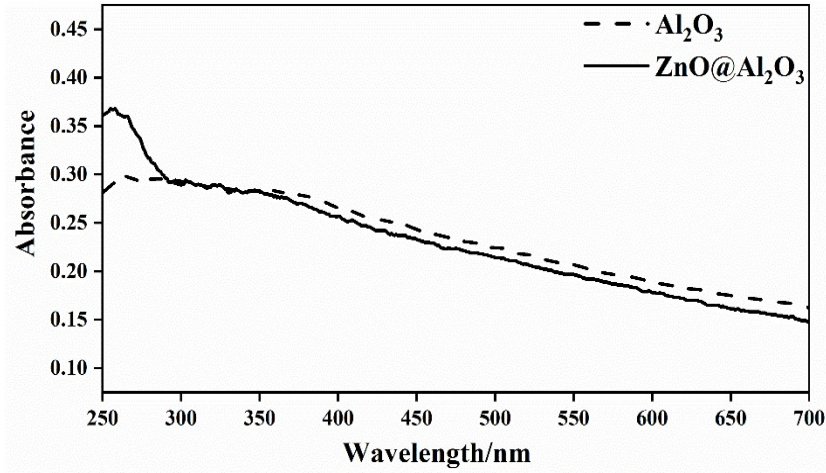

Figure S5 UV-VIS diffuse reflectance spectra of  $\text{Al}_2\text{O}_3$  and  $\text{ZnO@Al}_2\text{O}_3$

### Text S2 Calculation of the ratios of gene abundance before and after experiments

The relative abundance of targeted genes could not be calculated precisely in terms of housekeeping genes since housekeeping genes possibly changed after disinfection or photoreactivation, thus the ratios of each gene abundance before and after experiments were calculated via Eq. (1) - Eq. (5) (Livak et al., 2001):

$$Y = X \times (1 + Ev)^{C_T} \quad (1)$$

$$\lg X = \log Y - C_T \times \lg(1 + Ev) \quad (2)$$

$$\lg X_1 - \lg X_2 = -C_{T1} \times \lg(1 + Ev) + C_{T2} \times \lg(1 + Ev) \quad (3)$$

$$\lg \frac{X_1}{X_2} = (C_{T2} - C_{T1}) \times \lg(1 + Ev) \quad (4)$$

$$\frac{X_1}{X_2} = 10^{(C_{T2} - C_{T1})} = (1 + Ev)^{-(C_{T1} - C_{T2})} \quad (5)$$

where  $Y$  was the number of amplifications,  $X$  was the number of initial DNA template,  $Ev$  was the amplification efficiency,  $C_T$  was the cycle threshold. Eq. (1) and Eq. (2) were the basic theory on qPCR. When two different number of initial DNA templates reached the same fluorescence threshold, the difference between  $\lg X_1$  and  $\lg X_2$  was gained by Eq. (3). Finally, the ratio of  $X_1$  and  $X_2$  was obtained in Eq. (5).

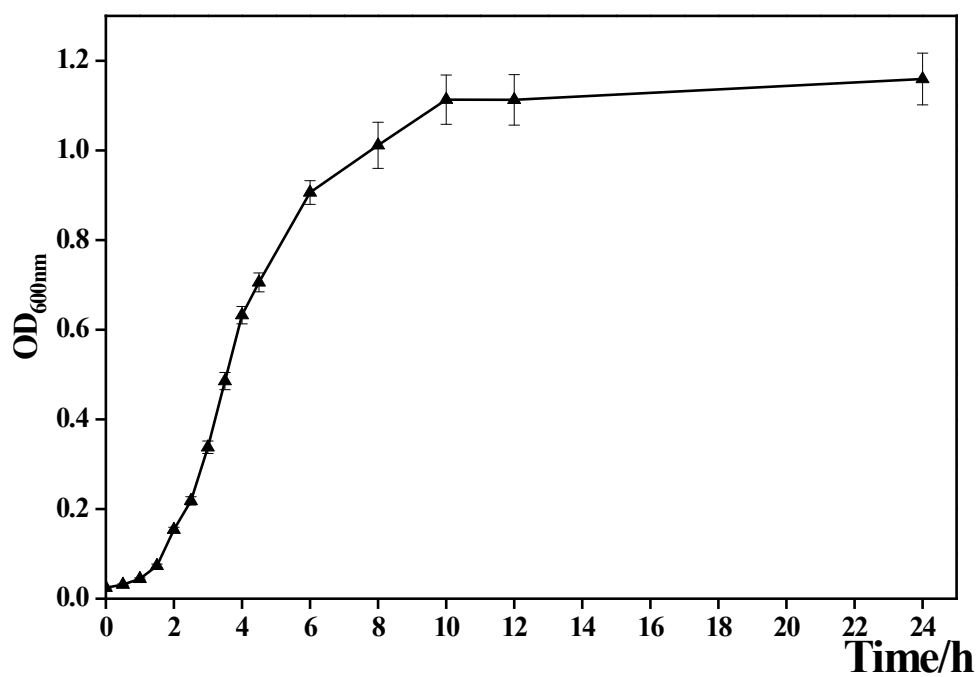

Figure S6 Growth curves of RP4-*E. coli* in selective liquid LB medium

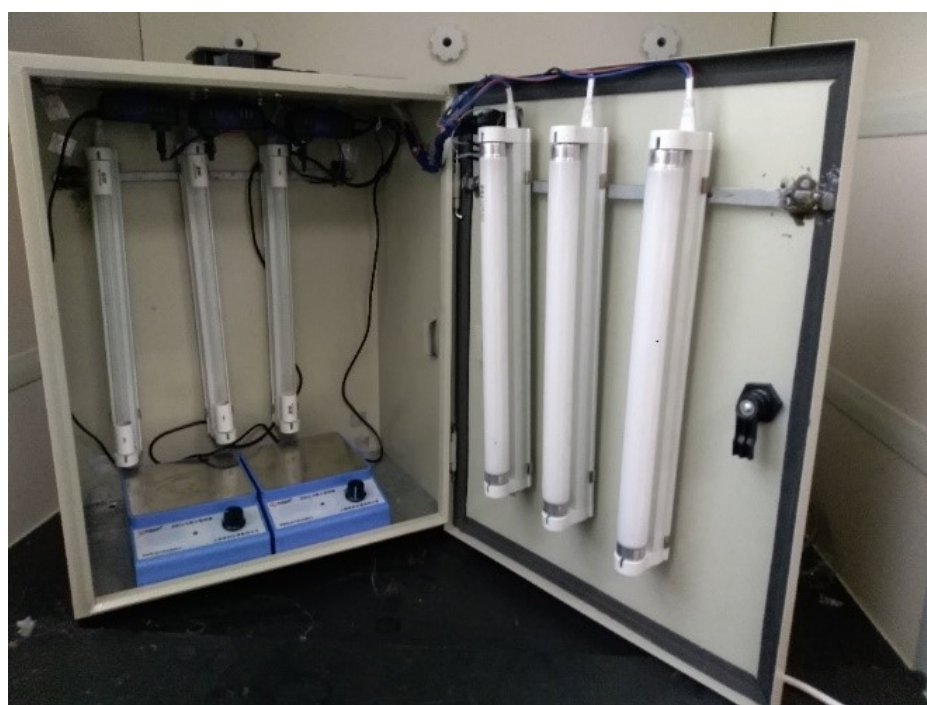

Figure S7 Reactor for disinfection and photoreactivation

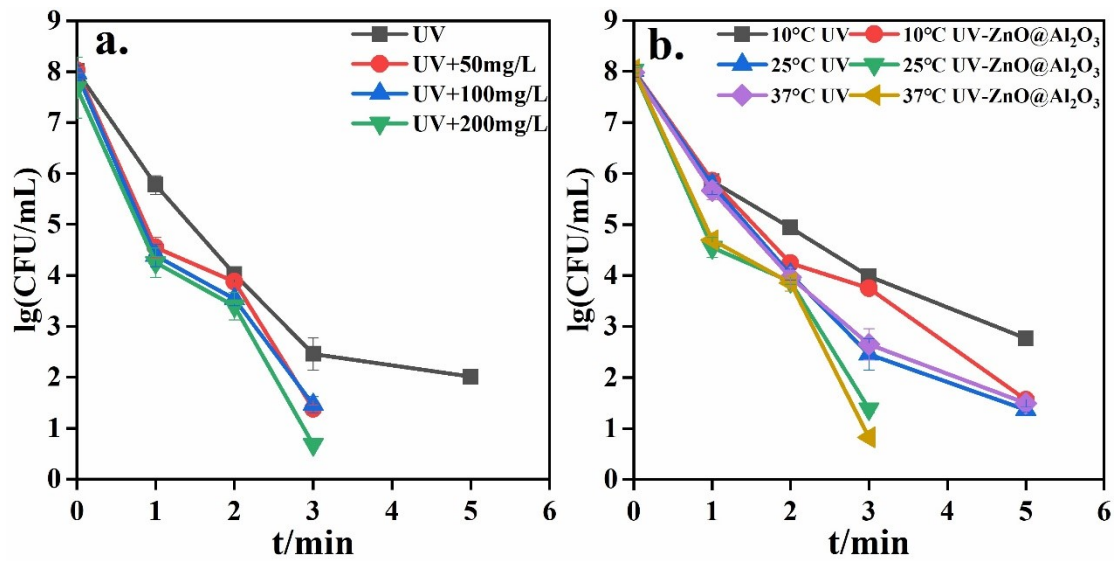

Figure S8 Survival numbers of RP4-*E. coli* in disinfection experiments over UV time.

a. T = 25 °C, [ZnO@Al<sub>2</sub>O<sub>3</sub>] = 0, 50, 100 and 200 mg/L; b. [ZnO@Al<sub>2</sub>O<sub>3</sub>] = 50 mg/L, T= 10, 25 and 37 °C

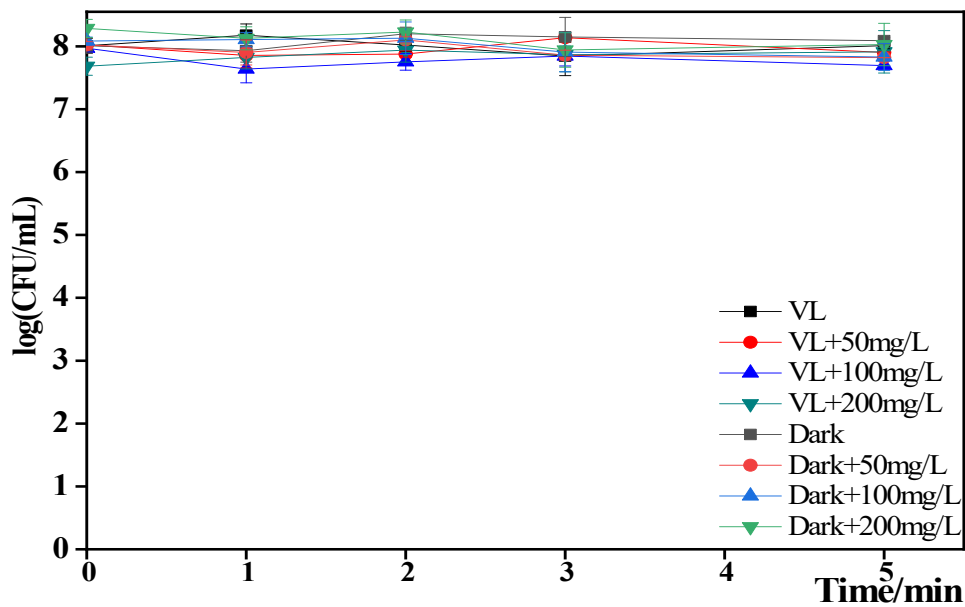

Figure S9 Bacterial numbers in absence and existence of ZnO@Al<sub>2</sub>O<sub>3</sub> when bacteria were exposed to dark or VL



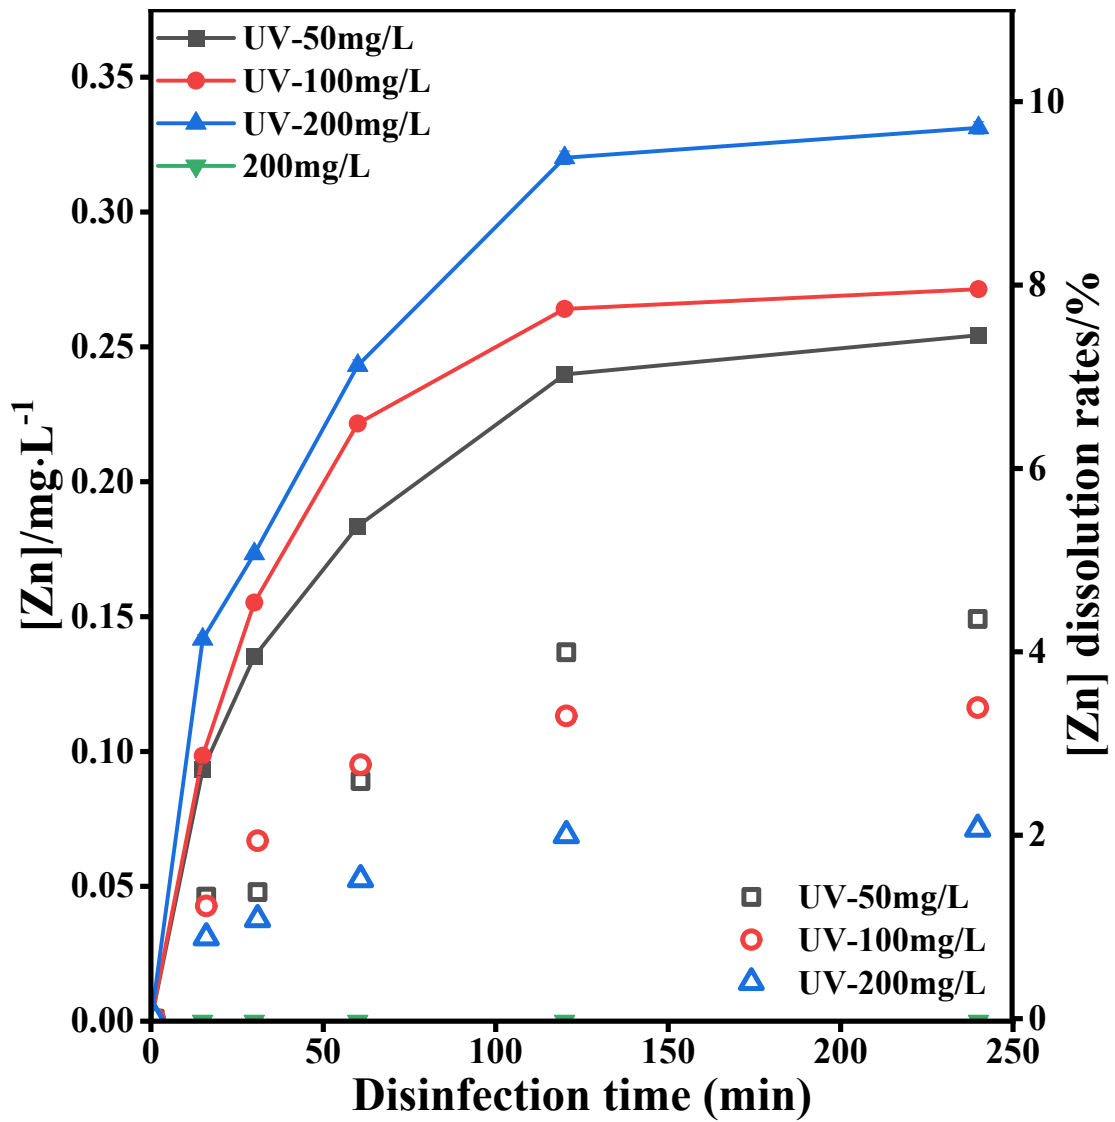

Figure S10 Zinc ion concentrations (left y) and dissolution rates (right y) over disinfecting time

(pH=7.0, T=25°C, target bacterial=RP4-*E. coli*)

Table S 1 Experimental conditions of photoreactivation

|                                                         | Disinfection<br>temperature/°C | ZnO@Al <sub>2</sub> O <sub>3</sub><br>dosage/mg·L <sup>-1</sup> | UV time/min | VL time/min                     |
|---------------------------------------------------------|--------------------------------|-----------------------------------------------------------------|-------------|---------------------------------|
| Changes in<br>disinfection<br>temperature and<br>dosage | 10                             | 0                                                               | 15          | 0、5、10、20、40、<br>60、120、180、240 |
|                                                         |                                | 50                                                              |             |                                 |
|                                                         |                                | 100                                                             |             |                                 |
|                                                         |                                | 200                                                             |             |                                 |
|                                                         | 25                             | 0                                                               |             |                                 |
|                                                         |                                | 50                                                              |             |                                 |
|                                                         |                                | 100                                                             |             |                                 |
|                                                         |                                | 200                                                             |             |                                 |
|                                                         | 37                             | 0                                                               |             |                                 |
|                                                         |                                | 50                                                              |             |                                 |
|                                                         |                                | 100                                                             |             |                                 |
|                                                         |                                | 200                                                             |             |                                 |
| Changes in UV<br>time                                   | 25                             | 0                                                               | 15、30、60、   | 240                             |
|                                                         |                                | 50                                                              | 120、240     |                                 |
|                                                         |                                | 100                                                             |             |                                 |
|                                                         |                                | 200                                                             |             |                                 |

Table S 2 Sequences of primers for qPCR

| Species | Genes           | Primer             | 5`-3`                  | Length of Product | Source |
|---------|-----------------|--------------------|------------------------|-------------------|--------|
| MGEs    | <i>traF</i>     | <i>traF</i> -F     | AAGTGTTTCAGGGTGCTTCTGC | 118bp             | [1]    |
|         |                 | <i>traF</i> -R     | GTCGCCTTAACCGTGGTGTT   |                   |        |
|         | <i>korA</i>     | <i>korA</i> -F     | TCGGGCAAGTTCTTGTCC     | 147bp             | [1]    |
|         |                 | <i>korA</i> -R     | GCAGCAGACCATCGAGATA    |                   |        |
| ARGs    | <i>aphA</i>     | <i>aphA</i> -F     | CGACGGTAGAGCAAAGGT     | 198bp             | [2]    |
|         |                 | <i>aphA</i> -R     | AGCGGACAGCATCAGTAA     |                   |        |
|         | <i>blaTEM-1</i> | <i>blaTEM-1</i> -F | CCAATGCTTAATCAGTGAGG   | 858bp             | [3]    |
|         |                 | <i>blaTEM-1</i> -R | ATGAGTATTCAACATTTCCG   |                   |        |
|         | <i>tetA</i>     | <i>tetA</i> -F     | GCTACATCCTGCTTGCCTTC   | 659bp             | [4]    |
|         |                 | <i>tetA</i> -R     | CATAGATCGCCGTGAAGAGG   |                   |        |

[1] Zhang Y., Aprü Z. G., He M., et al. Subinhibitory Concentrations of Disinfectants Promote the Horizontal Transfer of Multidrug Resistance Genes within and across Genera. *Environmental Science & Technology*, 2017, 51(1):570.

[2] Xu L., Zhao J., Liu Z.M., Wang Z.Y., Yu K.Q., Xing B.S. Cleavage and transformation inhibition of extracellular antibiotic resistance genes by graphene oxides with different lateral sizes. *Science of the Total Environment*, 2019, 695, 133932.

[3] Domínguez-Pérez R. A., Rocio T. L., Mariana A. C., et al. Detection of the antibiotic resistance genes *blaTem-1*, *cfxA*, *tetQ*, *tetM*, *tetW*, and *ermC* in endodontic infections of a Mexican population. *Journal of Global Antimicrobial Resistance*, 2018, 15:20-24.

[4] Wang S., Xue N., Li W., et al. Selectively Enrichment of antibiotics and ARGs by microplastics in river, estuary and marine waters. *Science of The Total Environment*, 2019, 708:134594.
